# Supplementary material for: Molecular architecture of the Gαi-bound TRPC5 ion channel
Source: PubMed Central journal article supplement (PMC10156788; doi:10.1038/s41467-023-38281-3), 2023-05-03
Supplement: 41467_2023_38281_MOESM1_ESM.pdf [file 41467_2023_38281_MOESM1_ESM.pdf]

## **Supplementary Information**

### **Molecular architecture of the G $\alpha_i$ -bound TRPC5 ion channel**

Jongdae Won, Jinsung Kim et al.

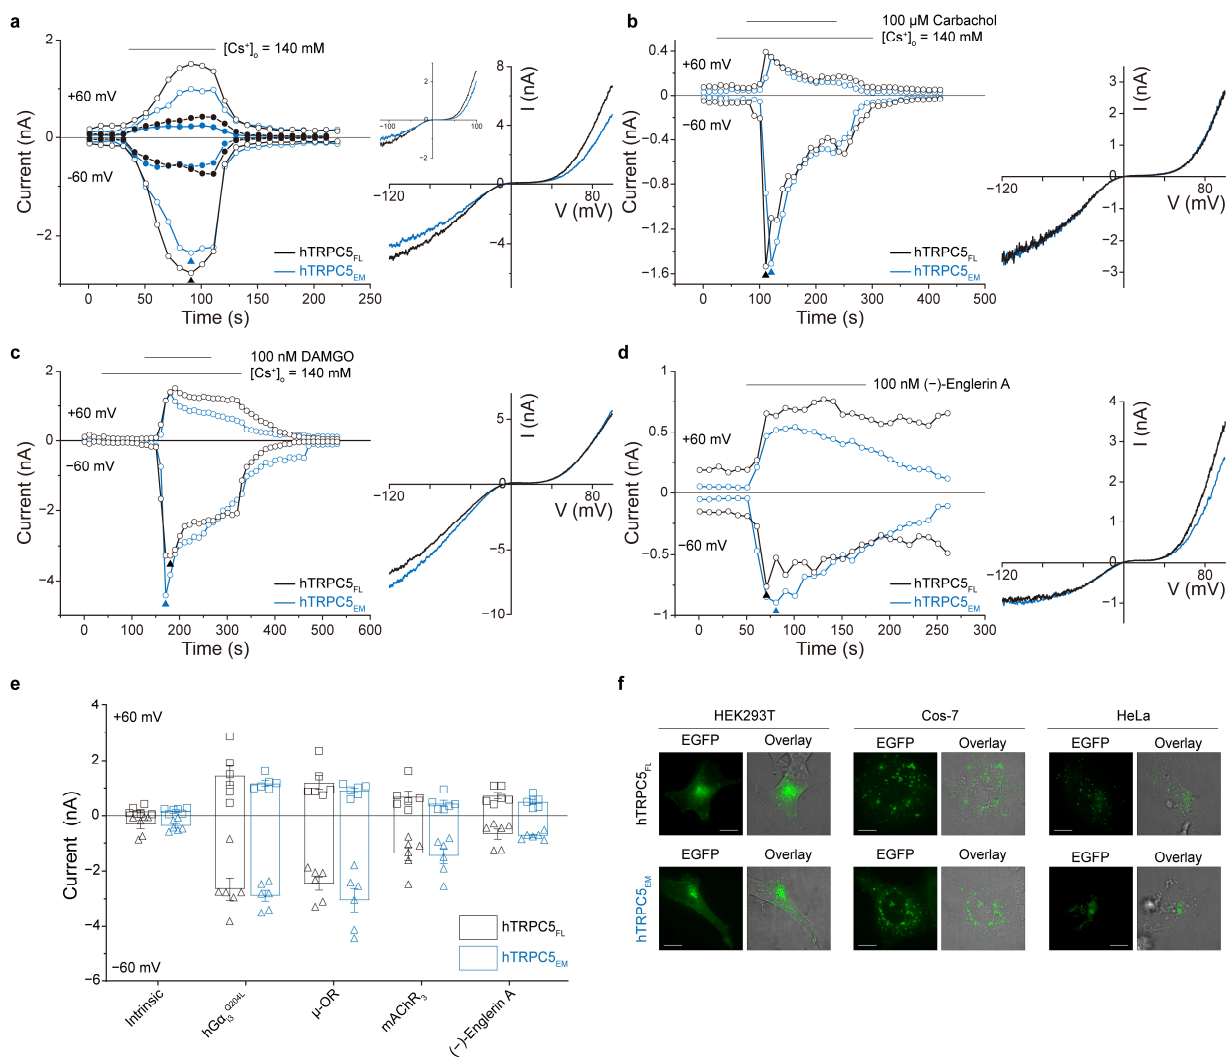

**Supplementary Fig. 1. Functional validation of the full-length human TRPC5 (TRPC5<sub>FL</sub>) channel and truncated human TRPC5 (TRPC5<sub>EM</sub>) channel used for cryo-EM.** The electrophysiological characteristics of the two channel constructs were examined through physiological activators (G<sub>q</sub>- or G<sub>i</sub>-signaling) or a pharmacological agonist [(-)-Englerin A] in HEK293T cells. The current-voltage (I-V) curve was from a ramp pulse at a specific time point annotated as triangles. **a**, Intrinsic activities (*filled circles*) of TRPC5 channels were measured using Cs-rich extracellular solution ( $[Cs^+]_o = 140 \text{ mM}$ , for complete compositions of extracellular

solutions, see *Methods*). The coexpression of the GTPase-deficient form of the alpha subunit of human inhibitory G-protein subtype 3 (hG $\alpha_{i3}^{Q204L}$ ) elicited a much larger cationic current (*open circles*) in both full-length and truncated channels. Inset I-V curves were from intrinsic currents.

**b**, Coexpressed with human muscarinic acetylcholine receptor subtype 3 (mAChR<sub>3</sub>), both full-length and truncated channels showed doubly-rectifying cationic current by extracellular carbachol (100  $\mu$ M), a potent ACh analog. **c**, Similar to (**b**), robust TRPC5 currents were measurable in cells coexpressing human mu-opioid receptor ( $\mu$ -OR) when 100 nM of DAMGO, a mu-opioid receptor agonist, was applied extracellularly. **d**, 100 nM (-)-Englerin A, a specific and potent TRPC4 or 5 channel activator, induced a strong cationic current for both full-length and truncated channels. **e**, A summarized current amplitude at  $\pm$  60 mV. No significant difference in current amplitudes was observable between full-length and truncated channels regardless of activation systems. The *p* values for differences between two channels at each condition are 0.791, intrinsic; 0.458, hG $\alpha_{i3}^{Q204L}$ ; 0.313,  $\mu$ -OR; 0.314, mAChR<sub>3</sub>; and 0.169, (-)-Englerin A for currents at +60 mV and 0.786, intrinsic; 0.596, hG $\alpha_{i3}^{Q204L}$ ; 0.239,  $\mu$ -OR; 0.830, mAChR<sub>3</sub>, and 0.748, (-)-Englerin A for currents at -60 mV. Bars represent the means  $\pm$  s.e.m. (*n* = 6 for each condition). *p* values were calculated in two-sided Student's t-test. **f**, Epi fluorescence and DIC overlay images of both channels in transiently transfected HEK293T, Cos-7 and HeLa cells (scale bars, 10  $\mu$ m). The expression patterns, i.e., the intracellular localizations of the two channel proteins, were similar in all three cell types. Six independent images were acquired in all three cell types.

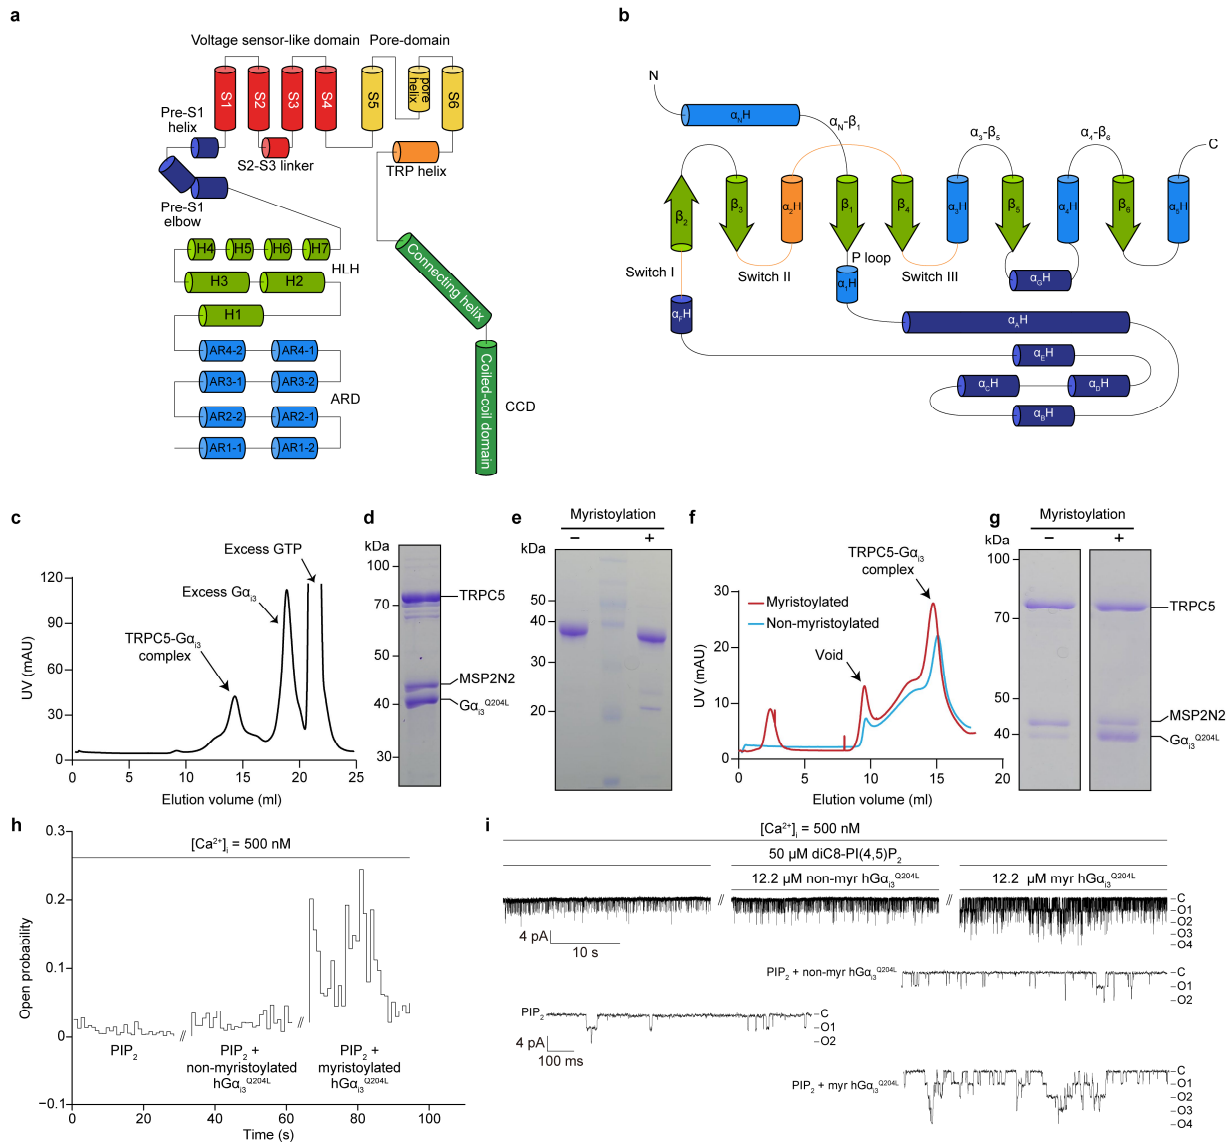

**Supplementary Fig. 2. Domain architectures of the TRPC5 and  $G\alpha_{i3}$ , purification of the TRPC5- $G\alpha_{i3}$  complex, and biochemical and electrophysiological evidence for the effect of myristoylation on the TRPC5- $G\alpha_{i3}$  complex.** **a**, Domain architecture of the human TRPC5 channel. ARD, ankyrin repeat domain; HLH, helix-loop-helix; CCD, coiled-coil domain. **b**, Domain architecture of the human  $G\alpha_{i3}$ . **c**, **d**, Purification of the TRPC5- $G\alpha_{i3}$  complex; representative size-exclusion chromatogram (**c**) and SDS-PAGE (**d**). More than ten independent

experiments of the complex purification were carried out with consistency. **e**, Validation of myristoylation in  $G\alpha_{i3}$ . Myristoylated  $G\alpha_{i3}$  shows faster electrophoretic mobility than non-myristoylated  $G\alpha_{i3}$ . SDS-PAGE was performed on a gel supplemented with 4 M urea. More than ten independent experiments of the purification of  $G\alpha_{i3}$  (myristoylated and non-myristoylated) were carried out with consistency. **f**, **g**, Effect of myristoylation on TRPC5- $G\alpha_{i3}$  binding; size-exclusion chromatograms (**f**) and SDS-PAGE of the peak fraction (**g**). Nanodisc-reconstituted TRPC5 was divided into two groups, each was mixed with myristoylated or non-myristoylated  $G\alpha_{i3}$  and subjected to size-exclusion chromatography. Myristoylated  $G\alpha_{i3}$  was coeluted with TRPC5 at an earlier retention time in size-exclusion chromatography (**f**) and showed stronger intensity in SDS-PAGE (**g**) indicating that the binding event occurs more favorably when the  $G\alpha_{i3}$  was myristoylated. Three independent experiments of the analytical size-exclusion chromatography and SDS-PAGE analysis were performed, and the results were consistently reproduced. **h**, Open probability trace with respect to each intracellular condition. **i**, Representative current trace from the excised patch according to intracellular conditions. Below are current traces with an expanded time scale. Non-myr, non-myristoylated; myr, myristoylated.

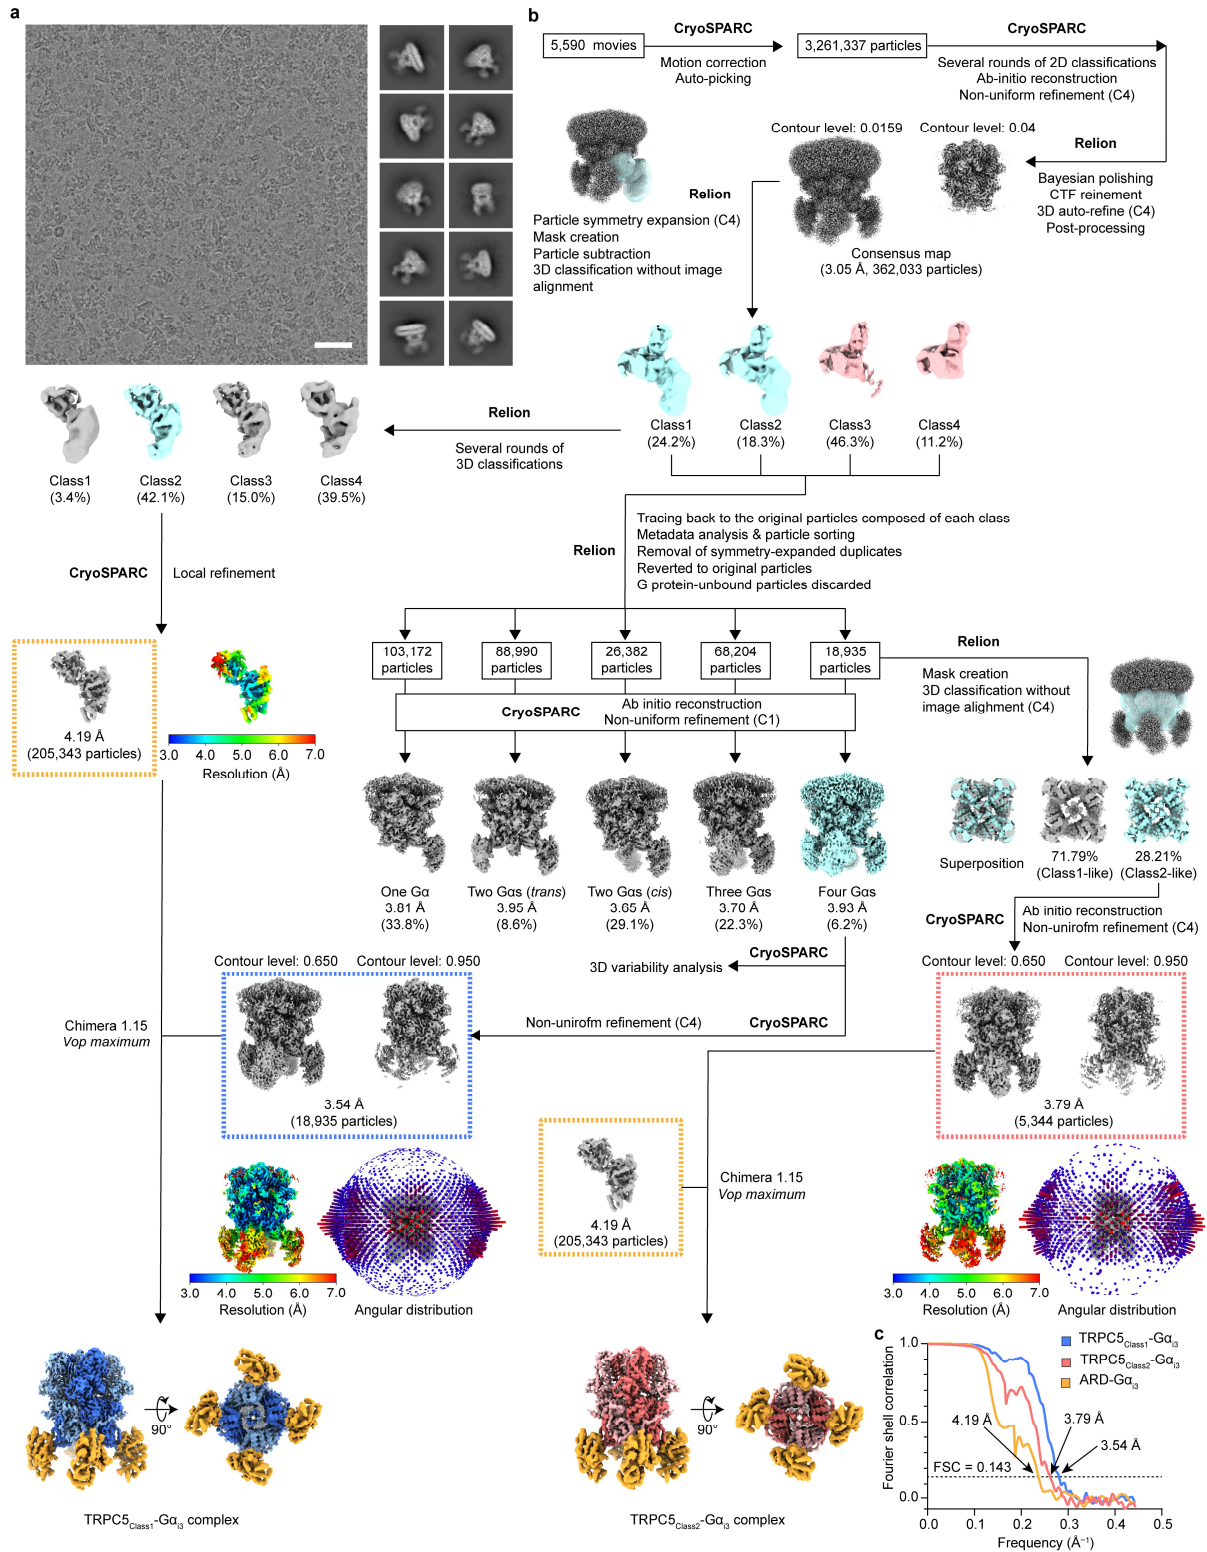

**Supplementary Fig. 3. Cryo-EM data processing of the TRPC5-G $\alpha_{i3}$  complexes. a,** Representative cryo-EM micrograph from 5,590 movies (scale bar, 50 nm) and 2D class averages of the TRPC5-G $\alpha_{i3}$  complexes. **b,** Workflow of cryo-EM data processing of the TRPC5-G $\alpha_{i3}$  complexes. All indicated contour levels are based on visualization using UCSF Chimera<sup>1</sup>. **c,** Gold-standard Fourier shell correlation curves of the inputs for the composite map: TRPC5<sub>Class1</sub>-G $\alpha_{i3}$  (blue), TRPC5<sub>Class2</sub>-G $\alpha_{i3}$  (red) and locally refined G $\alpha_{i3}$  (yellow).

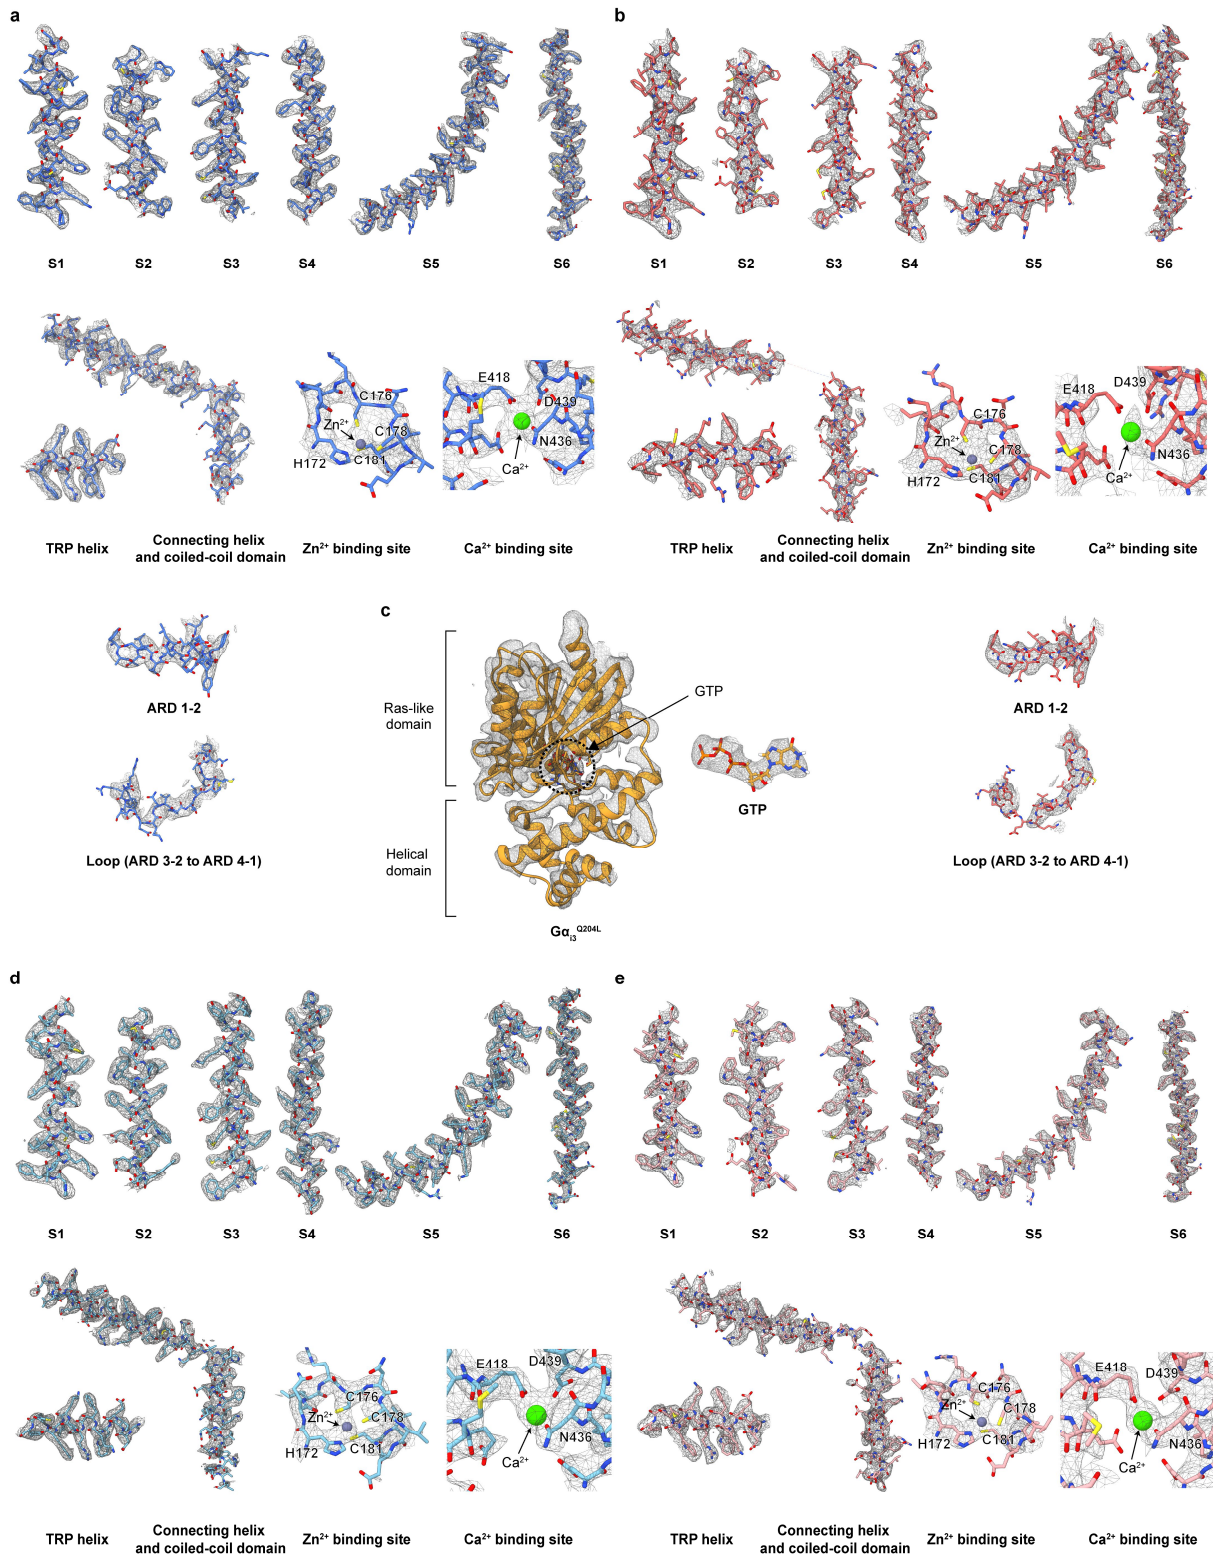



**Supplementary Fig. 4. Density map features in the cryo-EM structures of TRPC5-G $\alpha_{i3}$  complexes and TRPC5 in lipid nanodiscs. a–d**, Representative EM densities for various parts in TRPC5<sub>Class1</sub>-G $\alpha_{i3}$  (**a**), TRPC5<sub>Class2</sub>-G $\alpha_{i3}$  (**b**), G $\alpha_{i3}$  in the TRPC5-G $\alpha_{i3}$  complexes (**c**), TRPC5<sub>Class1</sub> (**d**) and TRPC5<sub>Class2</sub> (**e**).

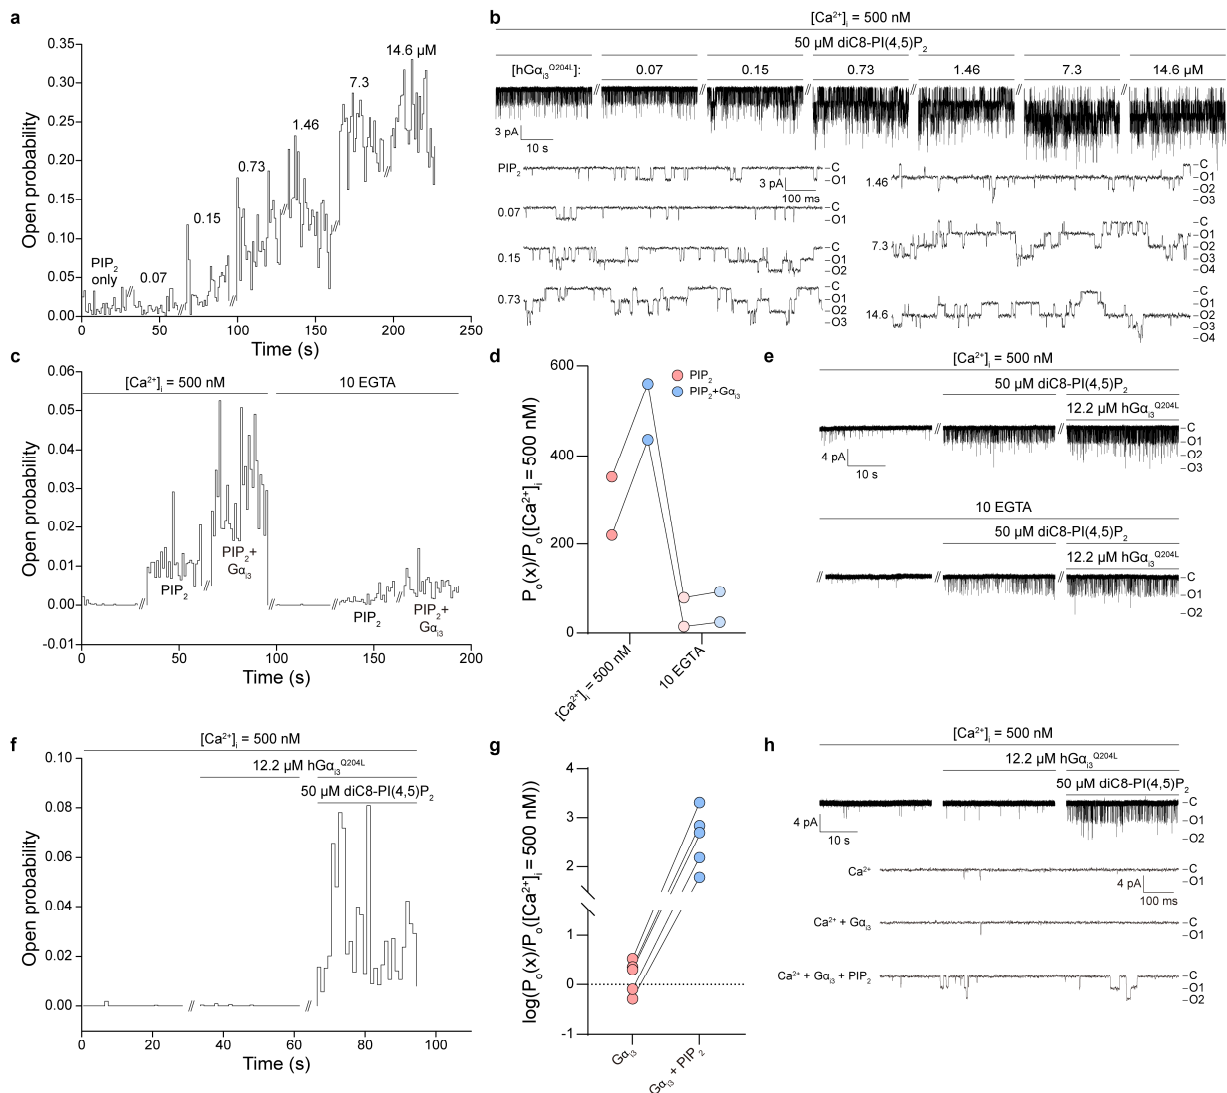

**Supplementary Fig. 5. Functional interplay among  $\text{Ca}^{2+}$ ,  $\text{PIP}_2$ , and  $\text{G}\alpha_{i3}$  in the activation process of the TRPC5 channel.** **a**, Open probability trace with respect to the concentration of purified  $\text{G}\alpha_{i3}^{\text{Q204L}}$  proteins. Fifty micromolar  $\text{PIP}_2$  was included in all protein samples to prevent run-down. **b**, Representative current trace from the excised patch. Below are current traces at each intracellular condition with an expanded time scale. **c**, Open probability trace according to each intracellular condition. The 10 EGTA solution contained 10 mM EGTA but no additional calcium chloride; therefore, only a trace amount of chelator-free calcium was expected to be present in the solution. **d**, Fold-increase in open probability with respect to the mean open probability at  $[\text{Ca}^{2+}]_i$

= 500 nM. **e**, A representative current trace is shown. **f**, Change in open probability with respect to each intracellular condition. **g**, **h**, Fold-increase in open probability (**g**) and representative current trace (**h**) are shown as in (**d**) and (**e**).

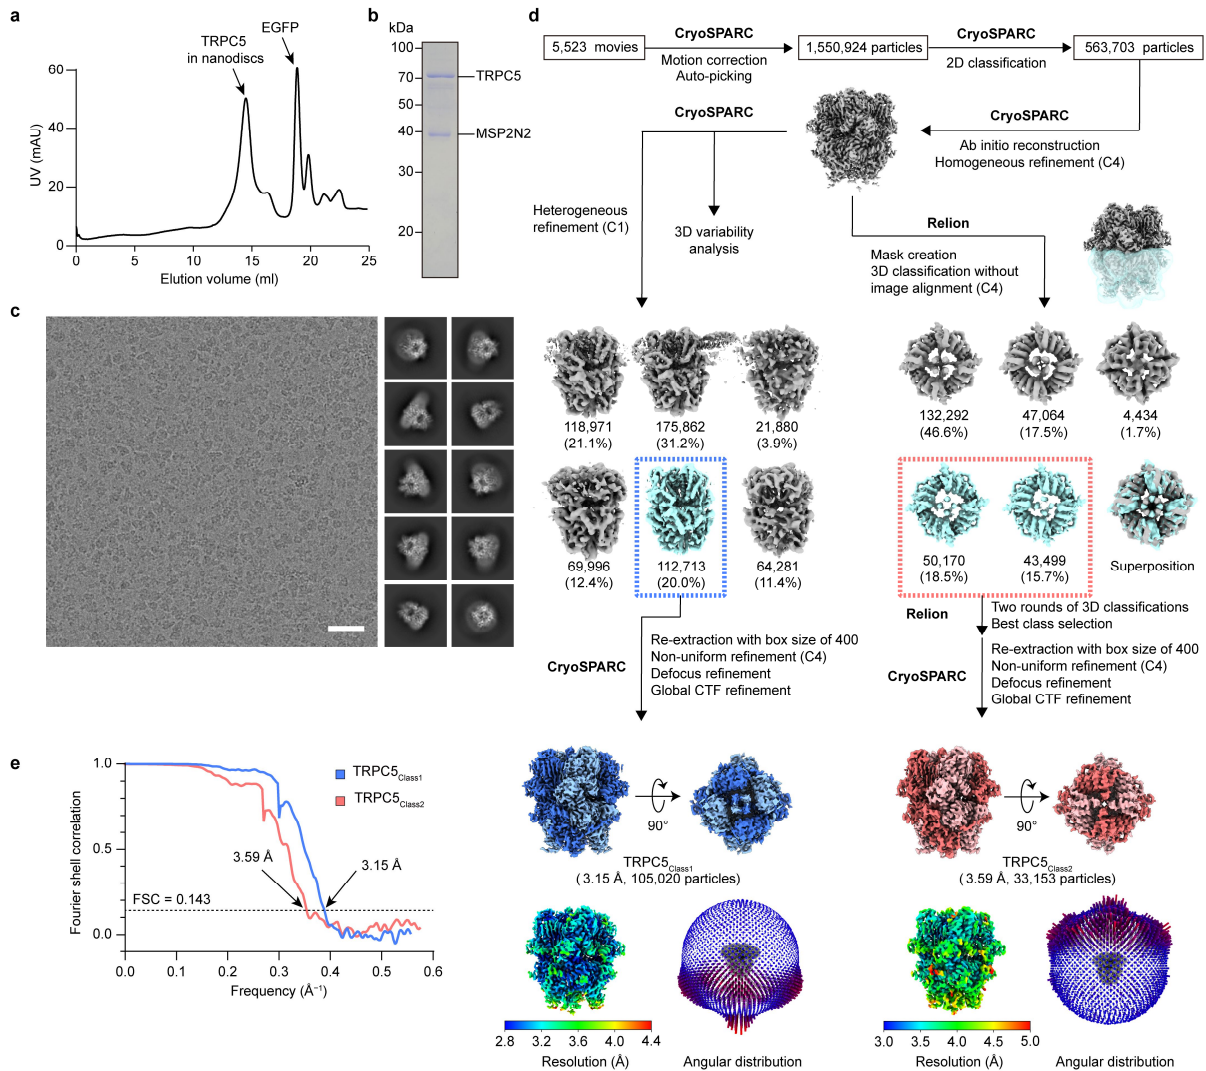

**Supplementary Fig. 6. Purification and cryo-EM data processing of TRPC5 structures in lipid nanodiscs.** **a, b**, Purification of TRPC5 in lipid nanodiscs; representative size-exclusion chromatogram (**a**) and SDS-PAGE (**b**). Four independent experiments of the purification of the TRPC5 in lipid nanodiscs were carried out with consistency. **c**, Representative cryo-EM micrograph from 5,523 movies (scale bar, 50 nm) and 2D class averages of TRPC5 in lipid nanodiscs. **d**, Workflow of cryo-EM data processing of TRPC5<sub>Class1</sub> and TRPC5<sub>Class2</sub> in lipid

nanodiscs. e, Gold-standard Fourier shell correlation curve for the 3D reconstructions of TRPC5 in lipid nanodiscs.

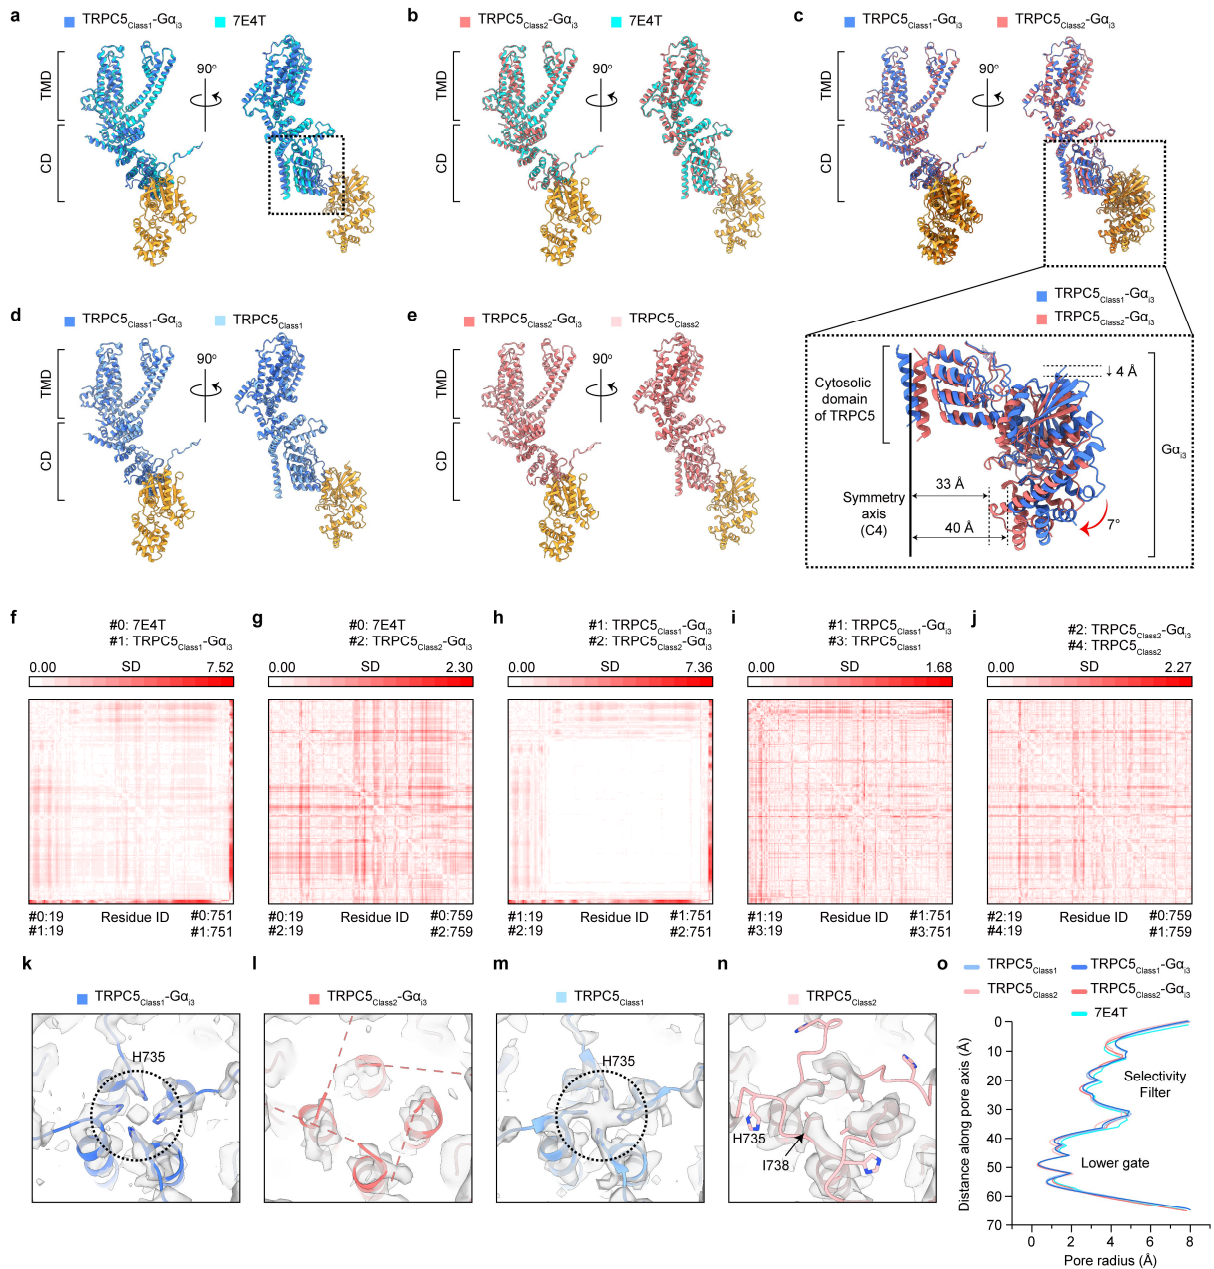

**Supplementary Fig. 7. Structural comparisons of the TRPC5 and TRPC5-Gα<sub>i3</sub> complexes.**

**a–e**, Structural comparisons of single chains from TRPC5<sub>Class1</sub>-Gα<sub>i3</sub> and TRPC5 in detergent (7E4T) (**a**), TRPC5<sub>Class2</sub>-Gα<sub>i3</sub> and TRPC5 in detergent (7E4T) (**b**), TRPC5<sub>Class1</sub>-Gα<sub>i3</sub> and TRPC5<sub>Class2</sub>-Gα<sub>i3</sub> (**c**), TRPC5<sub>Class1</sub>-Gα<sub>i3</sub> and TRPC5<sub>Class1</sub> (**d**), and TRPC5<sub>Class2</sub>-Gα<sub>i3</sub> and

TRPC5<sub>Class2</sub> (**e**). The RMSD values over C $\alpha$  atoms in one subunit between two structures are 1.841 Å (**a**), 0.557 Å (**b**), 1.728 Å (**c**), 0.456 Å (**d**), and 0.514 Å (**e**), respectively. Structural differences are highlighted in the dotted box (**a**, **c**). A close-up view and difference details of G $\alpha_{i3}$  are shown in the dotted box in (**c**) at the bottom. **f–j**, Difference distance matrix plots with two structures. 2D labels for standard deviation are depicted above the plots. The comparison sets are as follows: TRPC5-detergent with TRPC5<sub>Class1</sub>-G $\alpha_{i3}$  (**f**), TRPC5-detergent with TRPC5<sub>Class2</sub>-G $\alpha_{i3}$  (**g**), TRPC5<sub>Class1</sub>-G $\alpha_{i3}$  with TRPC5<sub>Class2</sub>-G $\alpha_{i3}$  (**h**), TRPC5<sub>Class1</sub>-G $\alpha_{i3}$  with TRPC5<sub>Class1</sub> (**i**), and TRPC5<sub>Class2</sub>-G $\alpha_{i3}$  with TRPC5<sub>Class2</sub> (**j**). **k–n**, Close-up views of the connecting helix-coiled-coil junction in TRPC5<sub>Class1</sub>-G $\alpha_{i3}$  (**k**), TRPC5<sub>Class2</sub>-G $\alpha_{i3}$  (**l**), TRPC5<sub>Class1</sub> (**m**), TRPC5<sub>Class2</sub> (**n**). Distinct metal-like densities coordinated by four H735 residues are highlighted in dotted circles. Dotted lines in (**l**) indicate unmodelled region between connecting helix and coiled-coil domain. **o**, Pore radii along the central axis in the TRPC5 and TRPC5-G $\alpha_{i3}$  complexes calculated from the HOLE program<sup>2</sup>. All structures show closed conformations at the lower gate. TMD, transmembrane domain; CD, cytosolic domain.

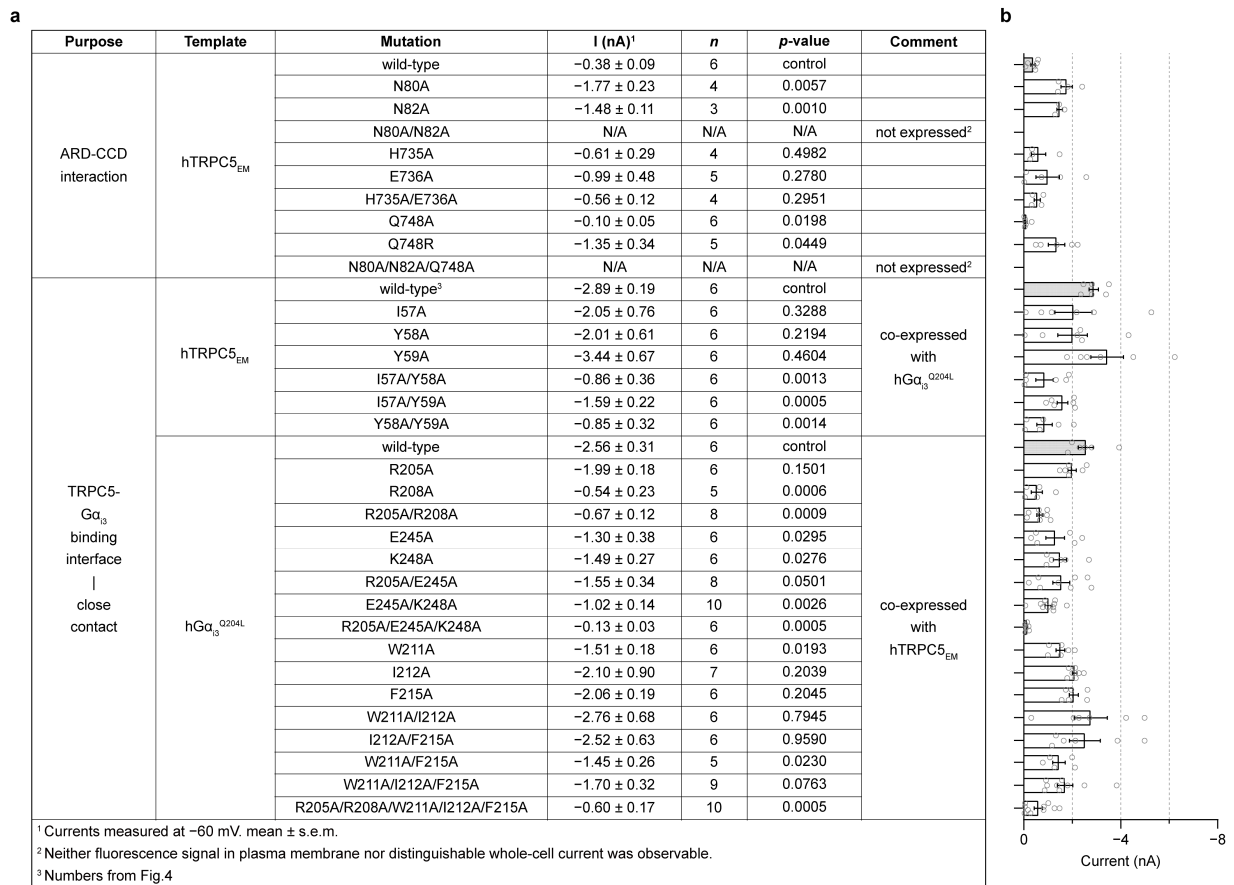

**Supplementary Fig. 8. List of mutations assessed for the ARD-CCD interaction within TRPC5 channels, and the binding interface between TRPC5 and the Gα<sub>i3</sub> protein. a,** Tables show the purpose of the mutation, template and mutation sites, the mean ± s.e.m. of current amplitudes, number of recordings, and p values from one-sided Student's t test with respect to the wild-type group for each purpose. **b,** Summary of current amplitudes is shown in bar graphs. Circles represent current amplitudes from independent recordings. The wild-type groups at each purpose are shaded in gray color.



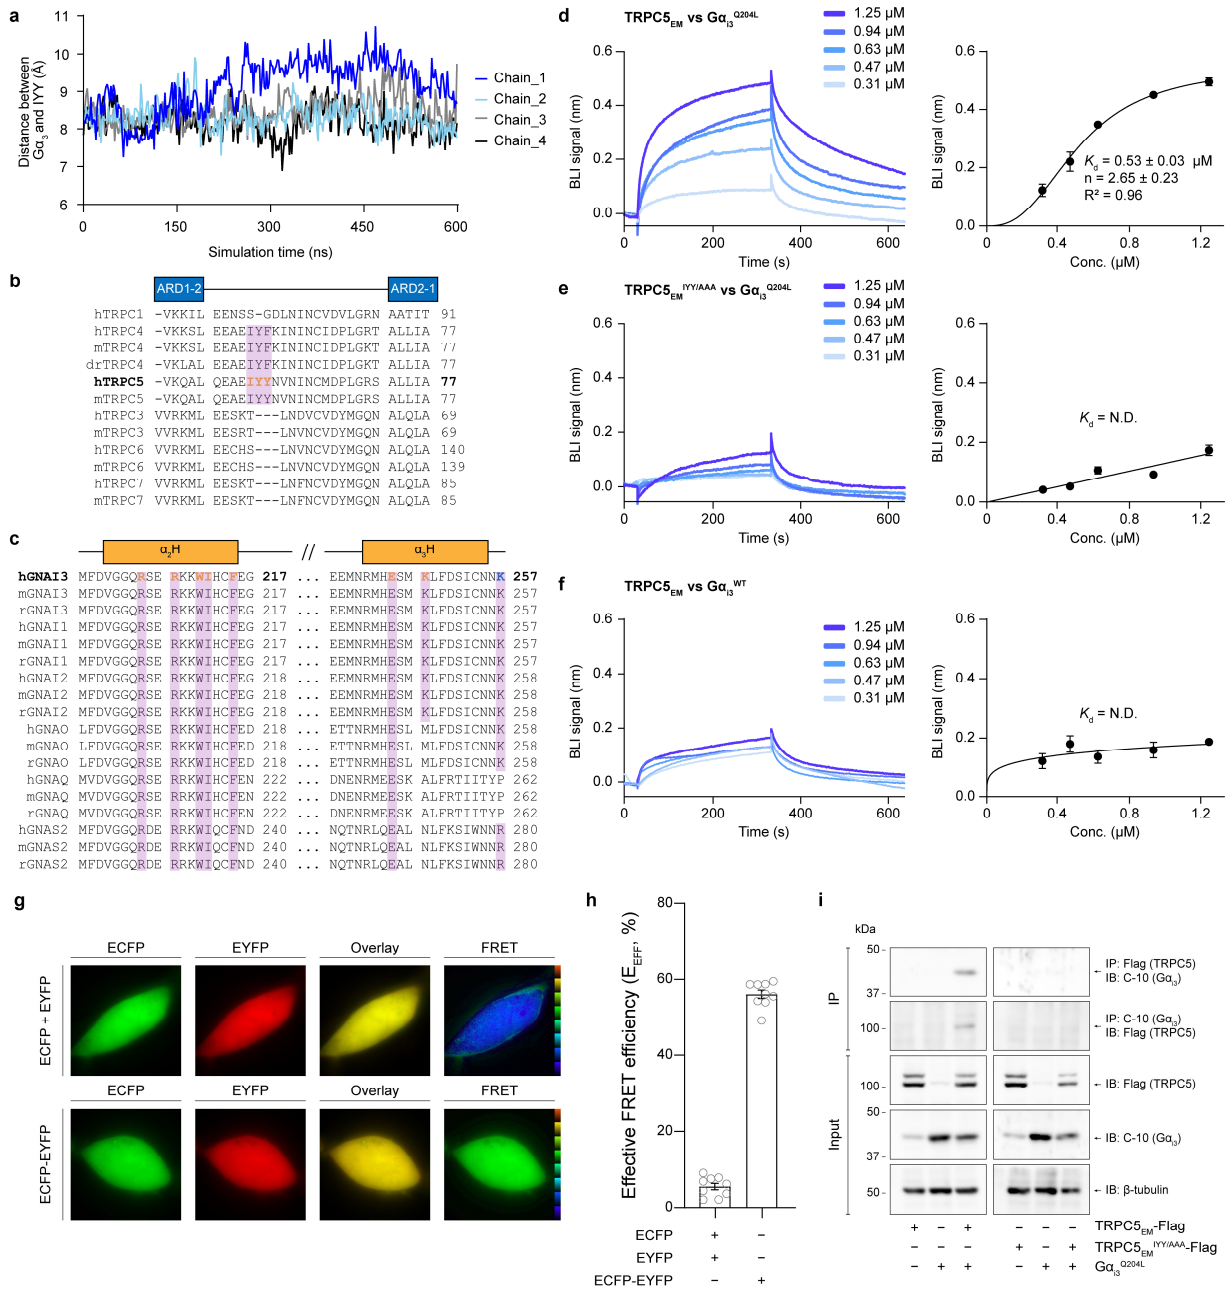

**Supplementary Fig. 9. Contribution of the IYY motif to complex formation between TRPC5 and  $G\alpha_3$ .** **a**, The distance between the IYY motif in TRPC5 and  $G\alpha_3$  plotted as a function of simulation time in MD simulation. **b**, **c**, Sequence alignment of TRPC (b) and  $G\alpha$  (c). The preceding lowercase for each sequence name indicates species (h, human; m, mouse; r, rat; dr,

*Danio rerio* also known as zebrafish). For the sequence name of G $\alpha$  proteins, a genetic nomenclature was adopted (GNAI, G alpha i; GNAO, G alpha o; GNAQ, G alpha q; GNAS2, G alpha s). The purple shading highlights the conserved sequence compared to the bolded sequence (human TRPC5 or human G $\alpha_{i3}$ ). For both TRPC and G $\alpha$  proteins, letters highlighted with orange color are residues that may be important for establishing close contact interactions through the IYY motif. A letter highlighted with blue color is a candidate residue for mediating long-range electrostatic interactions. **d–f**, Biolayer interferometry (BLI) assays of TRPC5<sub>EM</sub> vs. N-myristoylated G $\alpha_{i3}^{Q204L}$  (**d**), TRPC5<sub>EM</sub><sup>IYY/AAA</sup> vs. N-myristoylated G $\alpha_{i3}^{Q204L}$  (**e**), and TRPC5<sub>EM</sub> vs. N-myristoylated G $\alpha_{i3}^{WT}$  (**f**). BLI sensorgrams with each concentration of G $\alpha_{i3}$  are shown in different colors (left). Data were fitted to the Hill's equation (right). Symbols and bars represent the mean  $\pm$  s.e.m. of  $n =$  three independent experiments. **g**, Epi fluorescence images, overlay images, and FRET images from each expression pair. Images from cells coexpressing ECFP and EYFP (ECFP + EYFP) or cells expressing artificially linked ECFP-EYFP fusion protein (ECFP-EYFP) are shown as a qualitative calibration for FRET imaging. Colored E<sub>EFF</sub> indicators on the right side of FRET images were set to cover from 0% (dark blue) to 100% (red) linearly. Ex, excitation; Em, emission. **h**, Summary of E<sub>EFF</sub> from each expression pair ( $n = 9$ , ECFP + EYFP;  $n = 9$ , ECFP-EYFP). Bars represent the mean  $\pm$  s.e.m. **i**, TRPC5<sub>EM</sub>-Flag, TRPC5<sub>EM</sub><sup>IYY/AAA</sup>-Flag, and G $\alpha_{i3}^{Q204L}$  were either expressed alone or coexpressed in HEK293T cells, as shown below the blots. Five hundred micrograms of proteins from each condition was subjected to immunoprecipitation with anti-Flag antibody and probed with an antibody against G $\alpha_{i3}$  proteins (C-10), or vice versa.

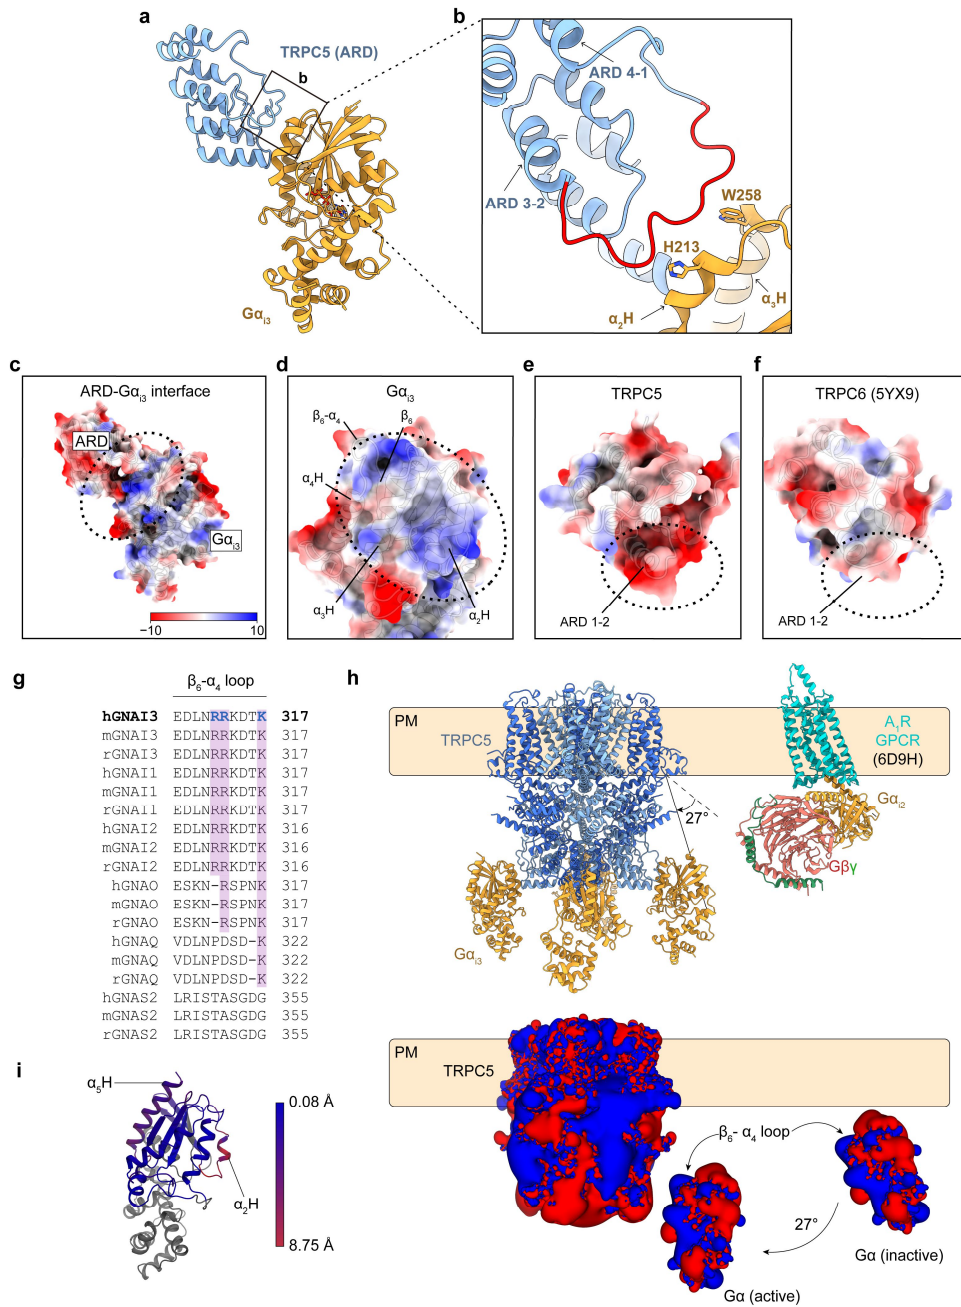

**Supplementary Fig. 10. Possible involvement of loop interactions and long-range electrostatic interactions in TRPC5-Gα<sub>13</sub> binding.** **a**, Side view of an atomic model focused on the ARD of TRPC5 and Gα<sub>13</sub>. The box indicates the TRPC5-Gα<sub>13</sub> interface expanded in **(b)**. **b**, Close-up view of the interface between the loop region of TRPC5 and Gα<sub>13</sub> with putative

interacting residues on  $G\alpha_{i3}$  (H213 and W258). **c–f**, Electrostatic (Coulombic) surfaces (scale in  $\text{kcal mol}^{-1} e^{-1}$ ) of ARD- $G\alpha_{i3}$  (**c**),  $G\alpha_{i3}$  (**d**), ARD of TRPC5 (**e**) and TRPC6 (**f**)<sup>3</sup>. Complementary electrostatic interaction (**c**) and electropositive (**d**), electronegative (**e**) and electroneutral (**f**) charges are highlighted in dotted circles. **g**, Sequence alignment of  $\beta_6$ - $\alpha_4$  loop of  $G\alpha$ . The preceding lowercase for each sequence name indicates species (h, human; m, mouse; r, rat; dr, *Danio rerio* also known as zebrafish). For the sequence name of  $G\alpha$  proteins, a genetic nomenclature was adopted (GNAI, G alpha i; GNAO, G alpha o; GNAQ, G alpha q; GNAS2, G alpha s). The purple shading highlights the conserved sequence compared to the bolded sequence (human  $G\alpha_{i3}$ ). Letters highlighted in blue color are candidate residues for mediating long-range electrostatic interactions. **h**, Schematic representation of the TRPC5- $G\alpha_{i3}$  complex and A<sub>1</sub>R- $G\alpha_{i2}\beta\gamma$  complex<sup>4</sup>. The dotted lines and the black line indicate the orientation of  $\alpha_5\text{H}$  of  $G\alpha_i$  in both complexes. Lines were drawn to highlight the relative orientation of two  $G\alpha$  subunits to the membrane (yellowish rectangle) (top). Isopotential contours of molecules are shown (bottom) ( $-25$  mV, red;  $+25$  mV, blue). A reorientation of  $G\alpha$  by tilting approximately  $27^\circ$  after dissociation from a GPCR-G complex is necessary for the positively charged surface of  $G\alpha$  to interact with the negatively charged surface of ARD in TRPC5. **i**, Schematic representation of an isolated  $G\alpha_{i3}$  from the TRPC5- $G\alpha_{i3}$  complex is shown. Color reflects the root mean squared deviation (RMSD) between  $G\alpha_{i3}$  and isolated  $G\alpha_{i2}$  from the A<sub>1</sub>R- $G\alpha_{i2}\beta\gamma$  structure<sup>4</sup>.  $\alpha_5\text{H}$  remained relatively still in both conformations.

**Supplementary Table 1. Cryo-EM data collection, refinement and validation statistics**

|                                                     | #1 TRPC5-G $\alpha_{i3}$ complex, Class1 (TRPC5) (EMD-33022) | #2 TRPC5-G $\alpha_{i3}$ complex (ARD-G $\alpha_{i3}$ ) (EMD-33022, EMD-34301) | #3 TRPC5-G $\alpha_{i3}$ complex, Class1 (composite <sup>b</sup> ) (EMD-33022) (PDB 7X6I) | #4 TRPC5 in lipid nanodiscs, Class1 (EMD-33021) (PDB 7X6C) | #5 TRPC5-G $\alpha_{i3}$ complex, Class2 (TRPC5) (EMD-34301) | #6 TRPC5-G $\alpha_{i3}$ complex, Class2 (composite <sup>c</sup> ) (EMD-34301) (PDB 8GVX) | #7 TRPC5 in lipid nanodiscs, Class2 (EMD-34300) (PDB 8GVW) |
|-----------------------------------------------------|--------------------------------------------------------------|--------------------------------------------------------------------------------|-------------------------------------------------------------------------------------------|------------------------------------------------------------|--------------------------------------------------------------|-------------------------------------------------------------------------------------------|------------------------------------------------------------|
| <b>Data collection and processing</b>               |                                                              |                                                                                |                                                                                           |                                                            |                                                              |                                                                                           |                                                            |
| Magnification                                       | 92,000                                                       | 92,000                                                                         |                                                                                           | 92,000                                                     | 92,000                                                       |                                                                                           | 92,000                                                     |
| Voltage (kV)                                        | 200                                                          | 200                                                                            |                                                                                           | 200                                                        | 200                                                          |                                                                                           | 200                                                        |
| Electron exposure (e <sup>-</sup> /Å <sup>2</sup> ) | 40                                                           | 40                                                                             |                                                                                           | 40                                                         | 40                                                           |                                                                                           | 40                                                         |
| Defocus range (μm)                                  | -1.0 ~ -2.0                                                  | -1.0 ~ -2.0                                                                    |                                                                                           | -1.0 ~ -2.0                                                | -1.0 ~ -2.0                                                  |                                                                                           | -1.0 ~ -2.0                                                |
| Pixel size (Å)                                      | 1.088                                                        | 1.088                                                                          |                                                                                           | 1.086                                                      | 1.088                                                        |                                                                                           | 1.086                                                      |
| Symmetry imposed                                    | C4                                                           | C1                                                                             |                                                                                           | C4                                                         | C4                                                           |                                                                                           | C4                                                         |
| Initial particle images (no.)                       | 3,261,337                                                    | 3,261,337                                                                      |                                                                                           | 1,550,924                                                  | 3,261,337                                                    |                                                                                           | 1,550,924                                                  |
| Final particle images (no.)                         | 18,935                                                       | 205,343 <sup>a</sup>                                                           |                                                                                           | 105,020                                                    | 5,344                                                        |                                                                                           | 33,153                                                     |
| Map resolution (Å)                                  | 3.54                                                         | 4.19                                                                           |                                                                                           | 3.15                                                       | 3.79                                                         |                                                                                           | 3.59                                                       |
| FSC threshold                                       | 0.143                                                        | 0.143                                                                          |                                                                                           | 0.143                                                      | 0.143                                                        |                                                                                           | 0.143                                                      |
| Map resolution range (Å)                            | 2.94 – 39.09                                                 | 3.44 – 44.92                                                                   |                                                                                           | 2.65 – 29.37                                               | 3.47 – 61.87                                                 |                                                                                           | 3.06 – 46.48                                               |
| <b>Refinement</b>                                   |                                                              |                                                                                |                                                                                           |                                                            |                                                              |                                                                                           |                                                            |
| Initial model used (PDB code)                       |                                                              |                                                                                | 7E4T & 2ODE                                                                               | 7E4T                                                       |                                                              | 7X6I, 7E4T                                                                                | 7E4T                                                       |
| Model resolution (Å)                                |                                                              |                                                                                | 3.93                                                                                      | 3.24                                                       |                                                              | 3.91                                                                                      | 3.54                                                       |
| FSC threshold                                       |                                                              |                                                                                | 0.5                                                                                       | 0.5                                                        |                                                              | 0.143                                                                                     | 0.143                                                      |
| Model composition                                   |                                                              |                                                                                |                                                                                           |                                                            |                                                              |                                                                                           |                                                            |
| Non-hydrogen atoms                                  |                                                              |                                                                                | 32,908                                                                                    | 22,632                                                     |                                                              | 32,916                                                                                    | 22,496                                                     |
| Protein residues                                    |                                                              |                                                                                | 3,968                                                                                     | 2,700                                                      |                                                              | 3,964                                                                                     | 2,684                                                      |
| Ligands                                             |                                                              |                                                                                | 24                                                                                        | 24                                                         |                                                              | 24                                                                                        | 24                                                         |
| <i>B</i> factors (Å <sup>2</sup> )                  |                                                              |                                                                                |                                                                                           |                                                            |                                                              |                                                                                           |                                                            |
| Protein                                             |                                                              |                                                                                | 178.60                                                                                    | 92.32                                                      |                                                              | 114.41                                                                                    | 82.16                                                      |
| Ligand                                              |                                                              |                                                                                | 128.18                                                                                    | 129.44                                                     |                                                              | 124.50                                                                                    | 78.94                                                      |
| R.m.s. deviations                                   |                                                              |                                                                                |                                                                                           |                                                            |                                                              |                                                                                           |                                                            |
| Bond lengths (Å)                                    |                                                              |                                                                                | 0.008                                                                                     | 0.004                                                      |                                                              | 0.004                                                                                     | 0.005                                                      |
| Bond angles (°)                                     |                                                              |                                                                                | 1.209                                                                                     | 0.703                                                      |                                                              | 1.153                                                                                     | 0.878                                                      |

**Supplementary Table 1. *continued***

|                   |       |       |       |       |
|-------------------|-------|-------|-------|-------|
| Validation        |       |       |       |       |
| MolProbity score  | 1.49  | 1.32  | 1.61  | 1.21  |
| Clashscore        | 6.34  | 3.20  | 11.54 | 3.61  |
| Poor rotamers (%) | 0.45  | 0.66  | 0.68  | 0.17  |
| Ramachandran plot |       |       |       |       |
| Favored (%)       | 97.25 | 96.70 | 97.85 | 97.73 |
| Allowed (%)       | 2.75  | 3.30  | 2.15  | 2.27  |
| Disallowed (%)    | 0.00  | 0.00  | 0.00  | 0.00  |

**Footnotes for Supplementary Table 1**

<sup>a</sup>Particles after symmetry expansion (C4)

<sup>b</sup>Composite map consists of #2 and #1

<sup>c</sup>Composite map consists of #2 and #5

## Supplementary References

- 1 Pettersen, E. F. *et al.* UCSF Chimera--a visualization system for exploratory research and analysis. *J Comput Chem* **25**, 1605-1612 (2004).
- 2 Smart, O. S., Neduvelil, J. G., Wang, X., Wallace, B. A. & Sansom, M. S. HOLE: a program for the analysis of the pore dimensions of ion channel structural models. *J Mol Graph* **14**, 354-360, 376 (1996).
- 3 Tang, Q. *et al.* Structure of the receptor-activated human TRPC6 and TRPC3 ion channels. *Cell Res* **28**, 746-755 (2018).
- 4 Draper-Joyce, C. J. *et al.* Structure of the adenosine-bound human adenosine A1 receptor-Gi complex. *Nature* **558**, 559-563 (2018).

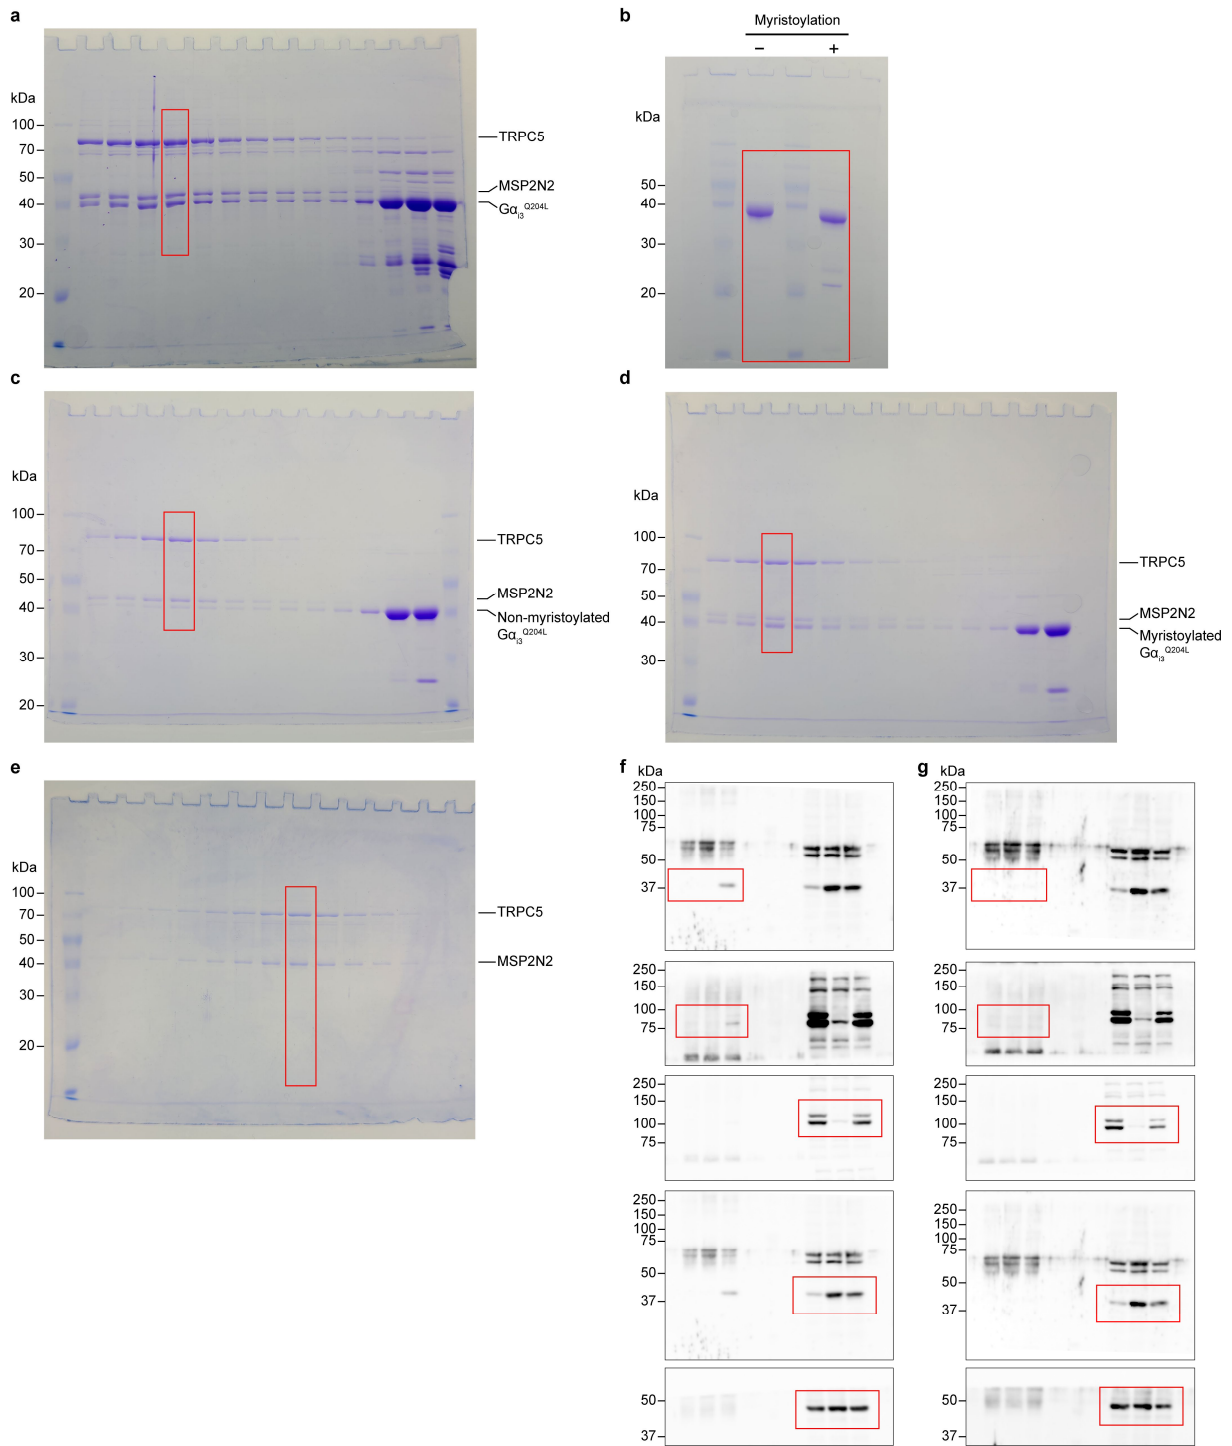

**Uncropped gels and blots corresponding to the Supplementary Figs.** Cropped regions are indicated as red boxes. **a**, Uncropped gel image for Supplementary Fig. 2d. **b**, Uncropped gel image



for Supplementary Fig. 2e. **c**, Uncropped gel image for Supplementary Fig. 2g, left (non-myristoylated). **d**, Uncropped gel image for Supplementary Fig. 2g, right (myristoylated). **e**, Uncropped gel image for Supplementary Fig. 6b. **f**, Uncropped blot images for Supplementary Fig. 9i, left. **g**, Uncropped blot images for Supplementary Fig. 9i, right.
