# Supplementary material for: Molecular architecture of the Gαi-bound TRPC5 ion channel
Source: PubMed Central journal article supplement (PMC10156788; doi:10.1038/s41467-023-38281-3), 2023-05-03
Supplement: 41467_2023_38281_MOESM3_ESM.pdf [file 41467_2023_38281_MOESM3_ESM.pdf]

**File name: Supplementary Movie 1**

**Description: Conformational dynamics of the TRPC5-G $\alpha_{i3}$  complex in lipid nanodiscs.**

**File name: Supplementary Movie 2**

**Description: Conformational dynamics of the TRPC5 in lipid nanodiscs.**

**File name: Supplementary Movie 3**

**Description: Molecular dynamics (MD) simulation of the TRPC5-G $\alpha_{i3}$  system.** A representative video of a 600-ns MD simulation of the TRPC5-G $\alpha_{i3}$  system, where G $\alpha_{i3}$  proteins bind stably to the ankyrin repeat domain of the TRPC5. TRPC5 is colored in transparent gray and G $\alpha_{i3}$  proteins are colored in orange. Only two diagonally opposed subunits of G $\alpha_{i3}$  are shown for clarity. All water and ion molecules are removed for clarity.

**File name: Supplementary Movie 4**

**Description: Molecular dynamics (MD) simulation of the TRPC5-PIP<sub>2</sub> system.** A representative video of a 600-ns MD simulation of the TRPC5-PIP<sub>2</sub> zoomed at one of four binding sites of PIP<sub>2</sub>. PIP<sub>2</sub> is colored in black, neighboring positively charged residues are colored in cyan, and other regions in TRPC5 are colored in transparent gray.
